RESEARCH ARTICLE

# Health Outcomes in US Children with Abdominal Pain at Major Emergency Departments Associated with Race and Socioeconomic Status

Louise Wang<sup>1</sup>, Corinna Haberland<sup>2</sup>, Cary Thurm<sup>3</sup>, Jay Bhattacharya<sup>4,5,6</sup>, K. T. Park<sup>4,7\*</sup>

**1** School of Medicine, Stanford University, Stanford, CA, United States of America, **2** Department of Health Research and Policy, Stanford University School of Medicine, Stanford, CA, United States of America, **3** Children's Hospital Association, Overland Park, KS, United States of America, **4** Center for Health Policy/Primary Care Outcomes Research, Stanford University, Stanford, CA, United States of America, **5** Department of Medicine, Stanford University School of Medicine, Stanford, CA, United States of America, **6** Department of Economics, Stanford University, Stanford, CA, United States of America, **7** Division of Gastroenterology, Hepatology, and Nutrition, Department of Pediatrics, Stanford University School of Medicine, Stanford, CA, United States of America

\* [ktpark@stanford.edu](mailto:ktpark@stanford.edu)

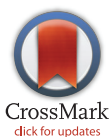

OPEN ACCESS

**Citation:** Wang L, Haberland C, Thurm C, Bhattacharya J, Park KT (2015) Health Outcomes in US Children with Abdominal Pain at Major Emergency Departments Associated with Race and Socioeconomic Status. *PLoS ONE* 10(8): e0132758. doi:10.1371/journal.pone.0132758

**Editor:** Takeru Abe, Yokohama City University, JAPAN

**Received:** June 2, 2014

**Accepted:** June 17, 2015

**Published:** August 12, 2015

**Copyright:** © 2015 Wang et al. This is an open access article distributed under the terms of the [Creative Commons Attribution License](https://creativecommons.org/licenses/by/4.0/), which permits unrestricted use, distribution, and reproduction in any medium, provided the original author and source are credited.

**Data Availability Statement:** All relevant data are within the paper and its Supporting Information files.

**Funding:** LW received research support from the Medical Scholars Program at Stanford University School of Medicine and the NASPGHAN Foundation for this study. JB is supported by CDEHA P30 AG17253 and NIH R21 AG041112. KP is supported by NIH DK094868. The manuscript contents are solely the responsibility of the authors, performed independent of all funding sources, and do not necessarily represent the official views of the NIH, NASPGHAN, or Stanford University.

## Abstract

### Objective

Over 9.6 million ED visits occur annually for abdominal pain in the US, but little is known about the medical outcomes of these patients based on demographics. We aimed to identify disparities in outcomes among children presenting to the ED with abdominal pain linked to race and SES.

### Methods

Data from 4.2 million pediatric encounters of abdominal pain were analyzed from 43 tertiary US children's hospitals, including 2.0 million encounters in the emergency department during 2004-2011. Abdominal pain was categorized as functional or organic abdominal pain. Appendicitis (with and without perforation) was used as a surrogate for abdominal pain requiring emergent care. Multivariate analysis estimated likelihood of hospitalizations, radiologic imaging, ICU admissions, appendicitis, appendicitis with perforation, and time to surgery and hospital discharge.

### Results

Black and low income children had increased odds of perforated appendicitis (aOR, 1.42, 95% CI, 1.32- 1.53; aOR, 1.20, 95% CI 1.14 – 1.25). Blacks had increased odds of an ICU admission (aOR, 1.92, 95% CI 1.53 - 2.42) and longer lengths of stay (aHR, 0.91, 95% CI 0.86 – 0.96) than Whites. Minorities and low income also had lower rates of imaging for their appendicitis, including CT scans. The combined effect of race and income on perforated appendicitis, hospitalization, and time to surgery was greater than either separately.

**Competing Interests:** The authors have declared that no competing interests exist.

## Conclusions

Based on race and SES, disparity of health outcomes exists in the acute ED setting among children presenting with abdominal pain, with differences in appendicitis with perforation, length of stay, and time until surgery.

## Introduction

Abdominal pain is the most common gastrointestinal (GI) symptom in the United States (US), with an estimated 15.9 million annual all-case outpatient encounters [1], including over 900,000 visits each year to the emergency department (ED) by US children less than 15 years of age [2]. In the 2009 data from the National Hospital Ambulatory Medical Care Survey, among all ED abdominal pain cases, 50% were found to require urgent or emergent care, while the other 50% were considered non-urgent [2]. In the ED setting, appropriate high-quality care for abdominal pain can result in quantifiable long-term differences in health outcomes, including survival [3]. However, the distinction between types of abdominal pain—“functional” and “organic”—in children is clinically challenging.

Children with functional abdominal pain are not found to have any organic abnormalities, often despite extensive medical workup, including blood work, imaging studies and endoscopic evaluations totaling over \$6000 per patient [4]. In contrast, children with organic abdominal pain have an identifiable metabolic, anatomic, infectious, or inflammatory cause [5], whose variable health outcomes are routinely dependent on timely intervention and management [3,6]

The clinical difficulty is particularly evident in the ED setting, where appendicitis is the top surgical emergency and often leads to an indicated intervention.[3, 7–8] Distinguishing appendicitis [6] from functional causes of pain such as constipation highlights the clinical importance to ensure timely, often life-saving, medical or surgical management. If delayed, perforated appendicitis [6] increases the risk of peritonitis by nearly five-fold [9] and carries the highest mortality among intra-abdominal conditions seen in the ED setting.

Evidence suggests that disparities of care involving inappropriate triage exist in ED settings, with EDs serving as the safety net for medically underserved populations [10–11]. Black adults are more likely to be triaged to a lower level of care and acuity [12–13], have increased wait times for an ICU bed [14] or evaluation for stroke [14], and lower odds of receiving opiates for headache and back pain complaints [15] or triaging to the coronary care unit [16]. In parallel, Black children have lower odds of undergoing laparoscopic appendectomy [17], being prescribed opiate or non-opiate pain medications [18], and receiving testing for chest pain [19].

Additionally, the preliminary evidence of disparities supports the notion that patients lacking insurance or access to a primary care physician are more likely to present to the ED with more non-urgent cases.[20–23]. In separate studies however, families with low incomes and socioeconomic status (SES) have a higher prevalence of abdominal pain among their children [24–25] with increased pain intensity, based on a self-reported scale [25]. In the context of appendicitis, Black and Hispanic children, as well as children on Medicaid, are more likely to have a perforated appendix as compared to White children [26].

However, no literature exists for children in the ED setting presenting with abdominal pain that describes differences in health outcomes based on race and socioeconomic status (SES).

We aim to achieve the following objectives in this study: 1) to identify disparities in health care outcomes among children presenting to the ED with abdominal pain, based on race and

SES and 2) to explain the possible mechanism underlying adverse health outcomes as a result of disparities to ED care.

## Methods

### Study Design

We used the Pediatric Health Information System (PHIS), a database of then 43 tertiary children’s hospitals belonging to the Child Health Corporation of America, to query 4.2 million patient encounters (representing 2.7 million pediatric patients (ages 0–30) occurring between January 1, 2004 and December 31, 2011 with discharge diagnoses of abdominal related cases (International Classification of Diseases, Ninth Revision (ICD-9) codes, including 530.x - 579.x, 787.x, 789.x). We further filtered for primary discharge diagnoses of abdominal pain linked to initial ED encounters (2,025,238 encounters, 47.9% of total encounters queried). [Fig 1](#)

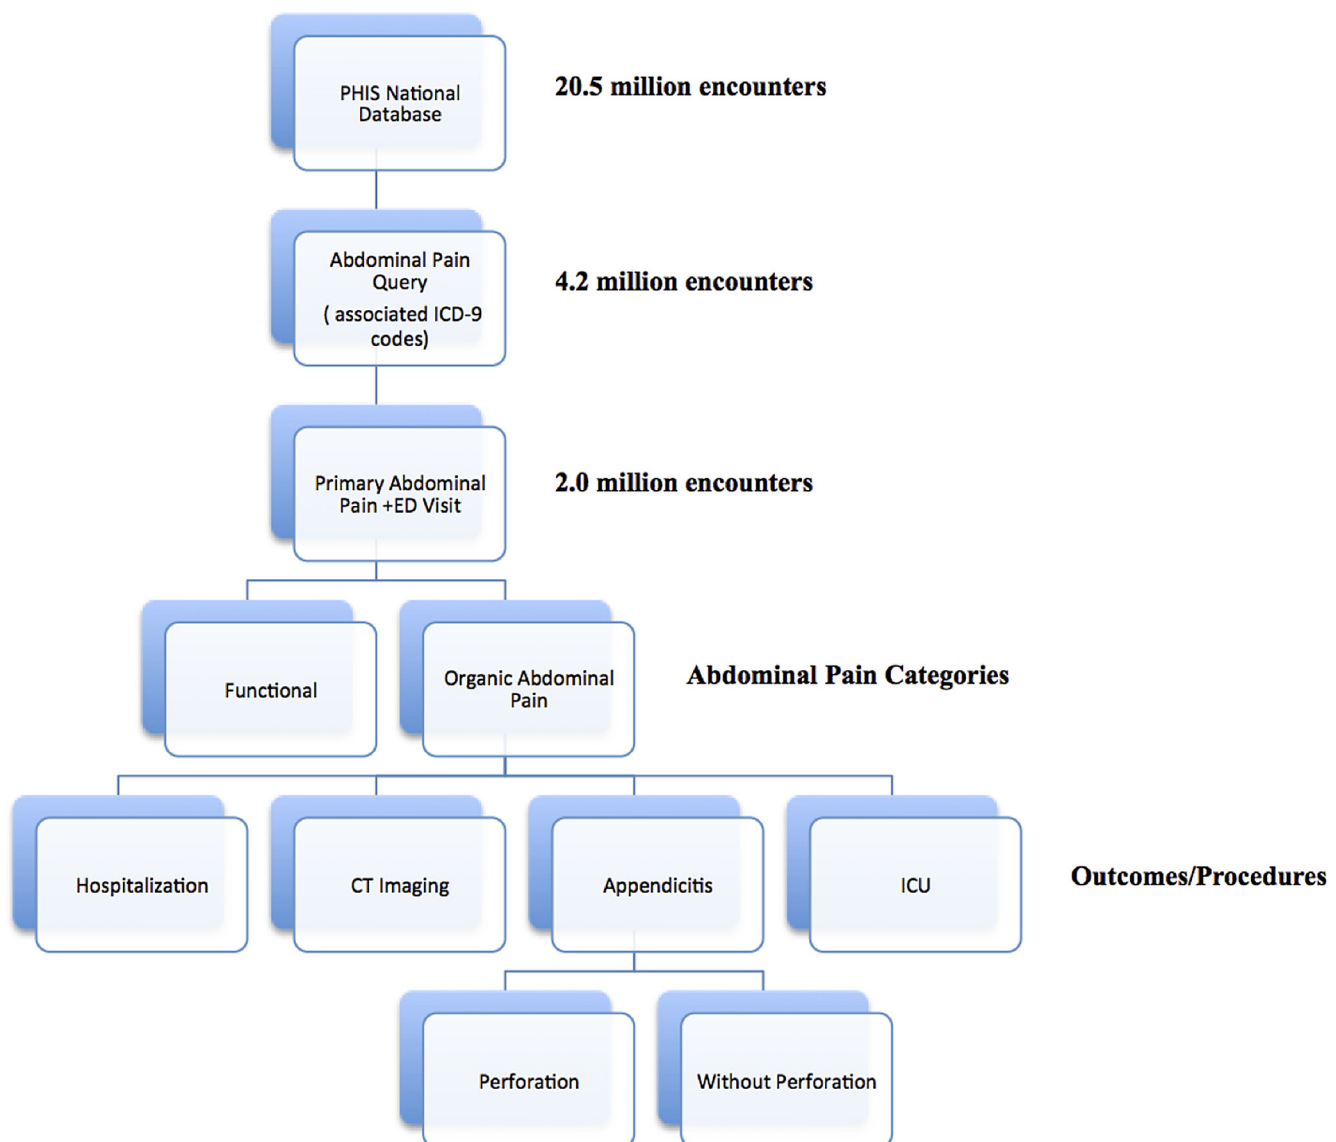

**Fig 1. Summary of Study.**

doi:10.1371/journal.pone.0132758.g001

summarizes the subject identification and filter process within our dataset prior to the analysis phase. We categorized the remaining encounters into functional and organic abdominal pain (functional: 307.7, 564.x, 787.6 789.x; organic: all other included ICD-9 codes such as 276.51, 530.81, 540.9, 558.9, 682.5). Most commonly, these organic abdominal pain diagnoses included urinary tract infection, dehydration, diarrhea, esophageal reflux, cellulitis, appendicitis, and unspecified gastritis and gastroduodenitis, and pyelonephritis. The Stanford University Institutional Review Board exempted this study from full board review since all patient data were de-identified, precluding any risk to any patient-identifiable information.

## Explanatory Variables

Our explanatory variables for all of our logistic regressions and Cox proportional hazard ratios were race/ethnicity, median household income, age, gender, payer type, hospital geographical region, and common chronic childhood diseases. Race/ethnicity categories included White, Black, Hispanic, Asian, and other. Household income category (SES) was based on the median household income generated by the US Census Data from 2010 (GeoLytics Dataset (East Brunswick, NJ) as defined by the patient's primary zip code, community level statistics that have been shown to represent the individual accurately as a proxy in hospital utilization studies [27]. Our study focused on the highest and lowest median income quartiles with quartile 1 (low income) as  $\leq \$32,214$  and quartile 4 (high income) as  $\geq \$52,917$ . Age was categorized in clinically significant intervals (0–5, 6–12, 13–18,  $\geq 19$ ). Payer types were Public (Medicare, Medicaid, Title V, other governmental sources), Private (Worker's Compensation, HMO, PPO, TRICARE, other insurance company), and Other (Self-pay and remaining insurance strata). Hospital geographical region categories were Northeast, Midwest, South, Southwest, and West. Based on the literature, binary variables of the following chronic childhood conditions were also captured for the past medical history: history of mental illness, diabetes, cystic fibrosis, obesity, malnutrition, prematurity, asthma, cerebral palsy, and non-specific developmental disability [28].

## Primary Outcome Measures

Our outcome variables for our logistic regressions were ICU admissions, primary diagnoses of appendicitis (ICD-9 540.x-543.x) and perforated appendix (ICD-9 540.0, 540.1), hospital admissions, and CT, MRI, and ultrasound imaging. Our outcome variables for our Cox proportional hazards models were time to surgery and time to discharge from the hospital, beginning with ED presentation.

## Statistical Analyses

We performed all analyses with Stata Statistical Software, version 12 SE (College Station, TX).

**Chi-squared test.** We used the chi-squared-test to detect differences in proportions within patient variables, such as SES levels and race categories. A p-value  $< 0.05$  was considered to be statistically significant, and we considered significant variables as explanatory variables in our later analyses.

**Multivariate logistic regressions.** Multivariate logistic regressions were used to determine the effect of explanatory variables (race/ethnicity, median household income, age, gender, payer type, hospital geographical region, and common chronic childhood diseases) on the primary outcome measures (ICU, primary diagnosis of appendicitis, perforated appendix, hospital admissions, and surgery). Each outcome variable was tested for potential interaction between the variables race and SES. The data was drawn from encounters from the emergency department with a primary diagnosis of abdominal pain, and all analyses were performed on

the patient encounters. When evaluating outcome variables with a complication of appendicitis, appendicitis was used as the denominator. CT, MRI, and ultrasound imaging were performed as a post hoc analysis.

**Extended Multivariate Cox proportional models.** We created two multivariate Cox proportional models to analyze time to surgery and time to discharge home. Time was noted to start from the ED visit and explanatory variables were the same as the logistic regressions as described above. We also tested the proportional hazards assumption via a log-log graph and graphed Schoenfeld residuals for race and income, and we have included an example in the supplementary figures ([S1](#) and [S2](#) Figs).

## Appendicitis as a Proxy for Organic Abdominal Pain

As mentioned in the introduction, appendicitis is a common organic cause for ED evaluations in infants and children. Clinically relevant, appendicitis represents a major diagnostic differential to consider for acute abdominal pain in the ED, requiring urgent or emergent abdominal surgery. Health outcomes in appendicitis are dependent on early detection and appropriate management. Thus, we assumed appendicitis with and without perforation to be a proxy for organic abdominal pain needing acute medical care. We also assumed that perforated appendicitis (i.e., appendicitis associated with generalized peritonitis or peritoneal abscess (ICD-9, 540.0, 540.1)) to be a natural disease sequelae of delayed surgical intervention from delayed patient presentation, delayed care, or previously missed diagnosis. We also assumed that patients with surgeries within the first two days of their encounter who had a primary diagnosis of appendicitis received an appendectomy.

## Results

### Patient Characteristics

Among the 4,227,129 abdominal pain encounters in the composite dataset from 2004 to 2011, 2,926,551 (69.2%) included an ED visit and 2,025,238 (47.9%) included an ED visit with primary diagnosis of abdominal pain, including appendicitis (2.9%). [Table 1](#) summarizes the patients included in the dataset. The median yearly household income was \$40,460. Grouped together, minority patients (43.4%, Black and Hispanic) constituted a nearly equal proportion to Whites (45.7%) in our dataset. While all regions of the US are represented, hospitals from the Midwest (31.7%) and South (25.1%), reported the highest proportion of encounters. Age distribution was similar for whites and blacks, but Hispanics had a greater number of patients in the 0–5 and 6–12 age group, rather than a greater percentage of older children.

### Minorities and Low Income Have Lower Hospital Observations and Less Imaging

Hospitalization rates from the ED for a primary diagnosis of abdominal pain (either organic or functional) were lower among Blacks (12.5%) or Hispanics (16.4%) than Whites (21.0%), although among the hospitalized, Blacks, Hispanics, and low income children were diagnosed with organic abdominal pain at approximately equal or higher proportions when compared to Whites and high income children ([Tables 2](#) and [3](#)). We also further stratified by race within income brackets for these various medical outcomes ([S1 Table](#)). Minorities (Blacks and Hispanics) and low income children had lower odds of hospital admissions than Whites, even after controlling for all primary diagnoses of organic abdominal pain ([Fig 2](#), [Table 4](#)). Additionally, of those presenting to the ED, Blacks and Hispanics had significantly lower odds of radiologic imaging for organic abdominal pain, including computerized tomography (CT),

**Table 1. Patient Demographics (Patient Encounters of Abdominal Pain).**

|                                           | Encounters | %    | Unique Patients | %    |
|-------------------------------------------|------------|------|-----------------|------|
| <b>TOTAL</b>                              | 4,227,129  |      | 2,698,692       |      |
| <b>GENDER</b>                             |            |      |                 |      |
| Male                                      | 2,045,118  | 48.4 | 1,311,089       | 48.6 |
| Female                                    | 2,181,830  | 51.6 | 1,389,235       | 51.5 |
| <b>RACE/ETHNICITY</b>                     |            |      |                 |      |
| White                                     | 1,944,955  | 47.6 | 1,232,862       | 45.7 |
| Black                                     | 937,481    | 22.9 | 590,922         | 21.9 |
| Hispanic                                  | 859,644    | 21.0 | 578,901         | 21.5 |
| Asian                                     | 73,785     | 1.8  | 51,387          | 1.9  |
| Other                                     | 272,424    | 6.7  | 198,880         | 7.4  |
| <b>PAYER</b>                              |            |      |                 |      |
| Public                                    | 2,134,716  | 51.7 | 1,350,498       | 50.0 |
| Private                                   | 1,359,269  | 32.9 | 940,983         | 34.9 |
| Self-Pay/Other                            | 633,026    | 15.3 | 480,481         | 17.8 |
| <b>AGE</b>                                |            |      |                 |      |
| 0–5                                       | 2,292,036  | 54.2 | 1,519,639       | 56.3 |
| 12–Jun                                    | 1,040,997  | 24.6 | 729,633         | 27.0 |
| 13–18                                     | 770,836    | 18.2 | 490,910         | 18.2 |
| > = 19                                    | 123,255    | 2.9  | 77,156          | 2.9  |
| <b>MEDICAL OUTCOMES</b>                   |            |      |                 |      |
| Appendicitis                              | 118,144    | 2.9  | 110,792         | 4.1  |
| Death                                     | 17,493     | 0.4  | 17,487          | 0.6  |
| ED                                        | 2,926,551  | 69.2 | 2,074,065       | 76.9 |
| ED Readmissions <sup>1</sup>              | 217,743    | 5.2  | 158,798         | 7.7  |
| Hospitalization                           | 1,434,933  | 34.0 | 932,240         | 34.5 |
| Hospitalization Readmissions <sup>2</sup> | 69,342     | 1.6  | 58,017          | 6.2  |
| ICU                                       | 209,350    | 5.0  | 156,739         | 5.8  |
| OR Visit                                  | 462,135    | 10.9 | 369,536         | 13.7 |
| <b>PAST MEDICAL HISTORY</b>               |            |      |                 |      |
| Asthma                                    | 808,061    | 19.1 | 361,469         | 13.4 |
| Obesity                                   | 108,397    | 2.6  | 41,290          | 1.5  |
| Diabetes                                  | 75,154     | 1.8  | 33,277          | 1.2  |
| Cystic Fibrosis                           | 38,713     | 0.9  | 9,217           | 0.3  |
| Malnutrition                              | 153,486    | 3.6  | 34,266          | 1.3  |
| Cerebral Palsy                            | 152,685    | 3.6  | 40,825          | 1.5  |
| Prematurity                               | 19,212     | 0.5  | 5,664           | 0.2  |
| Mental Illness                            | 226,231    | 5.4  | 73,420          | 2.7  |
| <b>HOSPITAL REGION</b>                    |            |      |                 |      |
| Northeast                                 | 559,004    | 13.5 | 356,403         | 13.2 |
| Midwest                                   | 1,313,080  | 31.7 | 781,619         | 29.0 |
| South                                     | 1,039,987  | 25.1 | 681,546         | 25.3 |
| Southwest                                 | 506,940    | 12.3 | 348,169         | 12.9 |
| West                                      | 720,822    | 17.4 | 472,828         | 17.5 |

<sup>1</sup> Calculated as percentage of those in ED

<sup>2</sup> Calculated as percentage of those in hospital

doi:10.1371/journal.pone.0132758.t001

**Table 2. Patient Diagnoses & Outcomes Stratified by Race from the ED.**

|                               | White   | %    | Black   | %    | Hispanic | %    |
|-------------------------------|---------|------|---------|------|----------|------|
| <b>ABDOMINAL PAIN</b>         |         |      |         |      |          |      |
| Organic                       | 543,345 | 46.1 | 342,136 | 45.1 | 355,204  | 53.1 |
| Functional                    | 259,695 | 22.0 | 162,569 | 21.5 | 139,149  | 20.8 |
| <b>APPENDICITIS</b>           |         |      |         |      |          |      |
| Total                         | 45,680  | 3.9  | 8,924   | 1.2  | 29,836   | 4.5  |
| With Perforation <sup>1</sup> | 13,406  | 29.3 | 3,293   | 36.9 | 12,333   | 41.3 |
| Hospitalization               | 168,494 | 21.0 | 63,038  | 12.5 | 81,081   | 16.4 |
| ICU                           | 41,764  | 3.5  | 20,097  | 2.7  | 13,962   | 2.1  |

<sup>1</sup>Percentage calculated as a fraction of patients with appendicitis.

doi:10.1371/journal.pone.0132758.t002

magnetic resonance imaging (MRI), and ultrasound scans (data not shown). Low income children with organic abdominal pain also had lower odds of CT scans as compared to high income children presenting to the ED.

### Minorities and Low Income Have Less Surgery, Increased Perforated Appendicitis, and Longer Hospital Stays

In an adjusted Cox proportional hazards model, following admittance through the ED, Blacks (aHR, 1.28, 95% CI 1.27–1.30) and Hispanics (aHR, 1.26, 95% CI 1.24–1.27) had nearly 30% higher likelihood of being discharged earlier for their organic abdominal pain than White patients. (Table 5). However, using appendicitis with perforation as a proxy for serious organic

**Table 3. Patient Outcomes Stratified by SES from the ED.**

|                               | High Income <sup>2</sup> | %    | Low Income <sup>3</sup> | %    |
|-------------------------------|--------------------------|------|-------------------------|------|
| <b>ABDOMINAL PAIN</b>         |                          |      |                         |      |
| Organic                       | 331,196                  | 46.7 | 383,012                 | 49   |
| Functional                    | 158,294                  | 22.3 | 160,635                 | 20.6 |
| <b>APPENDICITIS</b>           |                          |      |                         |      |
| Total                         | 30,282                   | 4.3  | 19,757                  | 2.5  |
| With Perforation <sup>1</sup> | 9,163                    | 30.3 | 7,805                   | 39.5 |
| Hospitalization               | 101,794                  | 20.8 | 82,468                  | 15.2 |
| ICU                           | 24,356                   | 3.4  | 18,938                  | 2.4  |
|                               | High Income <sup>2</sup> | %    | Low Income <sup>3</sup> | %    |
| <b>ABDOMINAL PAIN</b>         |                          |      |                         |      |
| Organic                       | 331,196                  | 46.7 | 383,012                 | 49   |
| Functional                    | 158,294                  | 22.3 | 160,635                 | 20.6 |
| <b>APPENDICITIS</b>           |                          |      |                         |      |
| Total                         | 30,282                   | 4.3  | 19,757                  | 2.5  |
| With Perforation <sup>1</sup> | 9,163                    | 30.3 | 7,805                   | 39.5 |
| Hospitalization               | 101,794                  | 20.8 | 82,468                  | 15.2 |
| ICU                           | 24,356                   | 3.4  | 18,938                  | 2.4  |

<sup>1</sup>Percentage calculated as a fraction of patients with appendicitis.

<sup>2</sup>High Income is defined as greater than top quartile income of \$52,917.

<sup>3</sup>Low Income is defined as below the bottom quartile income of \$32,214.

doi:10.1371/journal.pone.0132758.t003

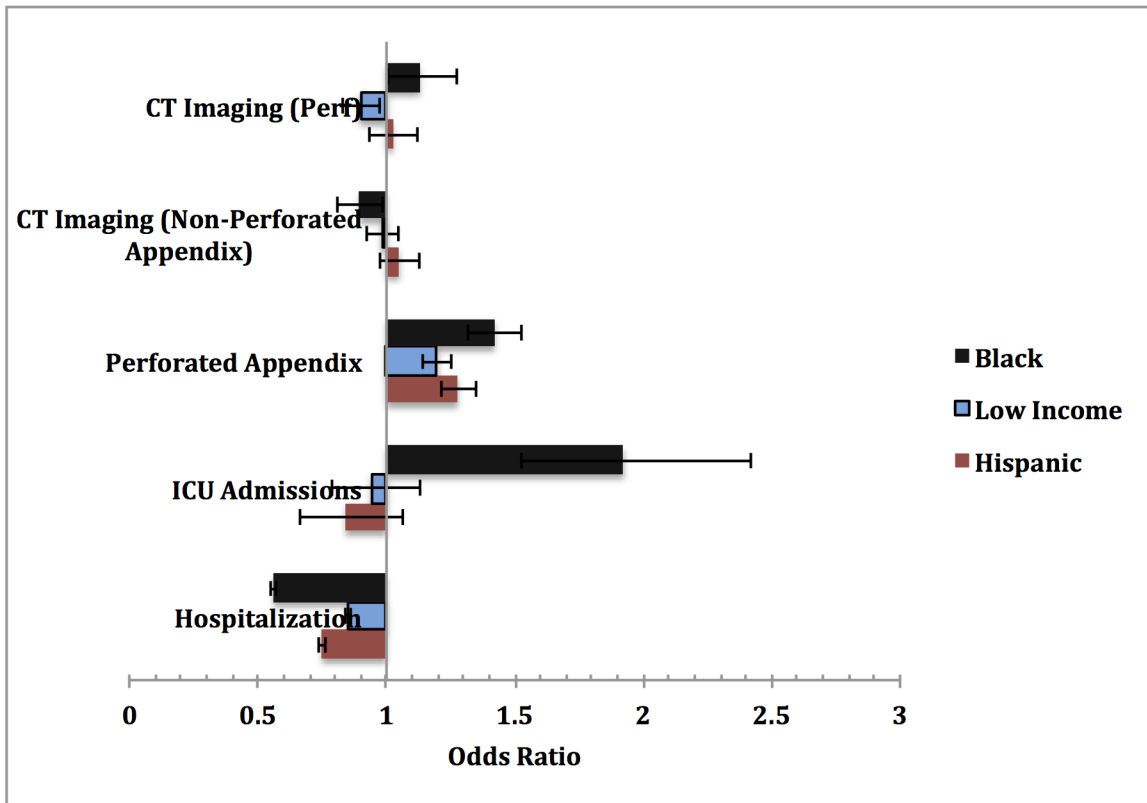

**Fig 2. Adjusted Odds Ratios Stratified by SES and Clinical Outcomes.**

doi:10.1371/journal.pone.0132758.g002

abdominal pain, Blacks (36.9%), Hispanics (41.3%), and low income children (29.3%) had lower rates of non-perforated appendicitis, but higher rates of appendicitis with perforation than Whites and high income children. Similarly, Blacks (aOR, 0.29, 95% CI 0.28–0.30) and low income children (aOR, 0.77, 95% CI 0.75–0.79) had lower odds of a primary diagnosis of non-perforated appendicitis but at least 20% increased odds of perforated appendicitis (aOR, 1.42, 95% CI, 1.32–1.53; aOR, 1.20, 95% CI 1.14–1.25) as compared to Whites and high income children (Table 4).

Blacks (aHR, 0.74, 95% CI 0.59–0.93), Hispanics (aHR, 0.75, 95% CI 0.75–0.90) and low income children (aHR 0.64, 95% CI 0.55–0.75) were at least 25% less likely of having surgery with their appendicitis at any time point than Whites and high income patients respectively. Low income patients (aHR, 0.61, 95% CI 0.48–0.77) were 39% less likely even with appendicitis with perforation to receive surgery at any time point. Blacks (aOR, 1.92, 95% CI 1.53–2.42) had more complex cases of appendicitis, with nearly two-fold higher odds of an ICU admission. They spent almost 10% longer in the hospital for their appendicitis than Whites (aHR, 0.91, 95% CI 0.86–0.96) (Table 5), even after controlling for a primary diagnosis of perforated appendicitis (aHR, 0.90, 95% CI 0.83–0.99).

### Combined Impact of Race and SES Is Greater than Either One Separately

When we evaluated race and income together, we found that the magnitude was greater than race or income alone (Table 6). Low income Blacks had 63% lower odds of receiving CT



**Table 4. SES Influence on Hospital Outcomes.**

|                                             | Adjusted OR | 95% CI      |
|---------------------------------------------|-------------|-------------|
| <b>PERFORATED APPENDIX</b>                  |             |             |
| White <sup>1</sup>                          | —           | —           |
| High Income ( $\geq$ \$52,917) <sup>2</sup> | —           | —           |
| Black                                       | 1.42        | (1.32–1.53) |
| Low Income ( $<$ \$32,214)                  | 1.20        | (1.14–1.25) |
| Hispanic                                    | 1.28        | (1.21–1.35) |
| <b>NON-PERFORATED APPENDIX</b>              |             |             |
| White <sup>1</sup>                          | —           | —           |
| High Income <sup>2</sup>                    | —           | —           |
| Black                                       | 0.29        | (0.28–0.30) |
| Low Income                                  | 0.77        | (0.75–0.79) |
| Hispanic                                    | 1.12        | (1.08–1.16) |
| <b>ICU ADMISSIONS</b>                       |             |             |
| White <sup>1</sup>                          | —           | —           |
| High Income <sup>2</sup>                    | —           | —           |
| Black                                       | 1.92        | (1.53–2.42) |
| Low Income                                  | 0.94        | (0.79–1.13) |
| Hispanic                                    | 0.84        | (0.67–1.06) |
| <b>CT IMAGING (Perforation)</b>             |             |             |
| White <sup>1</sup>                          | —           | —           |
| High Income <sup>2</sup>                    | —           | —           |
| Black                                       | 1.13        | (1.00–1.27) |
| Low Income                                  | 0.90        | (0.83–0.97) |
| Hispanic                                    | 1.03        | (0.93–1.13) |
| <b>CT IMAGING (Non-Perforated)</b>          |             |             |
| White <sup>1</sup>                          | —           | —           |
| High Income <sup>2</sup>                    | —           | —           |
| Black                                       | 0.90        | (0.81–0.99) |
| Low Income                                  | 0.98        | (0.93–1.05) |
| Hispanic                                    | 1.05        | (0.98–1.13) |
| <b>HOSPITALIZATION</b>                      |             |             |
| White <sup>1</sup>                          | —           | —           |
| High Income <sup>2</sup>                    | —           | —           |
| Black                                       | 0.56        | (0.55–0.57) |
| Low Income                                  | 0.85        | (0.84–0.86) |
| Hispanic                                    | 0.75        | (0.74–0.76) |

<sup>1</sup>Whites are compared to Blacks and Hispanics.

<sup>2</sup>High Income is compared to Low Income.

doi:10.1371/journal.pone.0132758.t004

imaging for organic abdominal pain (aOR, 0.37, 95% CI 0.36–0.39) and 10% lower odds of CT imaging for non-perforated appendicitis (aOR, 0.86, 95% CI 0.76–0.97), magnitudes lower than either race or income alone. Low income Blacks also had decreased odds of hospitalization (aOR, 0.45, 95% CI 0.44–0.46) and non-perforated appendicitis but 65% increased odds for perforated appendicitis (aOR, 1.65, 95% CI 1.50–1.81), again larger than race or income alone.

**Table 5. Time to Discharge from the ED and Hospital.**

|                                    | Adjusted HR | 95% CI      |
|------------------------------------|-------------|-------------|
| <b>ORGANIC ABDOMINAL PAIN</b>      |             |             |
| White and High Income <sup>1</sup> | —           | —           |
| White or High Income <sup>2</sup>  | —           | —           |
| Black                              | 1.28        | (1.27–1.30) |
| Low Income                         | 0.90        | (0.89–0.91) |
| Black + Low Income                 | 1.11        | (1.09–1.12) |
| Hispanic                           | 1.26        | (1.24–1.27) |
| <b>TOTAL APPENDICITIS</b>          |             |             |
| White and High Income <sup>1</sup> | —           | —           |
| White or High Income <sup>2</sup>  | —           | —           |
| Black                              | 0.91        | (0.86–0.96) |
| Low Income                         | 0.89        | (0.86–0.92) |
| Black + Low Income                 | 0.85        | (0.79–0.91) |
| Hispanic                           | 0.99        | (0.96–1.03) |
| <b>PERFORATED APPENDIX</b>         |             |             |
| White and High Income <sup>1</sup> | —           | —           |
| White or High Income <sup>2</sup>  | —           | —           |
| Black                              | 0.90        | (0.83–0.99) |
| Low Income                         | 1.04        | (0.99–1.10) |
| Black + Low Income                 | 0.94        | (0.84–1.05) |
| Hispanic                           | 0.84        | (0.67–1.06) |
| <b>NON-PERFORATED APPENDIX</b>     |             |             |
| White and High Income <sup>1</sup> | —           | —           |
| White or High Income <sup>2</sup>  | —           | —           |
| Black                              | 1.00        | (0.94–1.07) |
| Low Income                         | 0.85        | (0.82–0.89) |
| Black + Low Income                 | 0.90        | (0.83–0.98) |
| Hispanic                           | 1.05        | (1.00–1.11) |

<sup>1</sup>White and High Income is compared to Black and Low Income.

<sup>2</sup>White is compared to Black or Hispanic. High Income is compared to Low Income.

doi:10.1371/journal.pone.0132758.t005

Low income Blacks had more severe cases of appendicitis, with 15% delayed discharges for total appendicitis (aHR, 0.85, 95% CI 0.79–0.91) (Table 5, Fig 3), including 10% for specifically non-perforated appendicitis (aHR, 0.90, 95% CI 0.83–0.98). They also had 97% increased odds of ICU admission for appendicitis (aOR, 1.97, 95% CI 1.47–2.64) and had lower odds of receiving surgery at any given time point when compared to high income Whites. In a post hoc analysis, we excluded children ages 0–5 because they were less likely to get appendicitis. The magnitude of the results increased and the trend was the same.

### High Income Blacks Have Less Hospitalization and Worse Outcomes than Low Income Whites

Nevertheless, when the opposite scenario is considered—low income Whites compared to high income blacks—low income Whites had increased odds of hospitalization (aOR, 1.33, 95% CI 1.29–1.37) and CT imaging (aOR, 1.44, 95% CI 1.35–1.53) for their organic abdominal pain

**Table 6. Combined effect of SES and Race on Hospital Outcomes.**

|                                    | Adjusted OR | 95% CI      |
|------------------------------------|-------------|-------------|
| <b>PERFORATED APPENDIX</b>         |             |             |
| White and High Income              | —           | —           |
| Black and Low Income               | 1.65        | (1.50–1.81) |
| <b>NON-PERFORATED APPENDIX</b>     |             |             |
| White and High Income              | —           | —           |
| Black and Low Income               | 0.21        | (0.20–0.22) |
| <b>ICU ADMISSIONS</b>              |             |             |
| White and High Income              | —           | —           |
| Black and Low Income               | 1.97        | (1.47–2.64) |
| <b>CT IMAGING (Perforation)</b>    |             |             |
| White and High Income              | —           | —           |
| Black and Low Income               | 0.99        | (0.85–1.15) |
| <b>CT IMAGING (Non-Perforated)</b> |             |             |
| White and High Income              | —           | —           |
| Black and Low Income               | 0.86        | (0.76–0.97) |
| <b>HOSPITALIZATION</b>             |             |             |
| White and High Income              | —           | —           |
| Black and Low Income               | 0.45        | (0.44–0.46) |

doi:10.1371/journal.pone.0132758.t006

than high income Blacks (Fig 4). Similarly, low income whites had a higher odds of appendicitis, but lower odds of perforated appendicitis (aOR, 0.81, 95% CI 0.71–0.93) (Fig 4). Low income Whites had higher rates of times to surgery and time to discharge than high income Blacks and low income blacks (Figs 3 and 5).

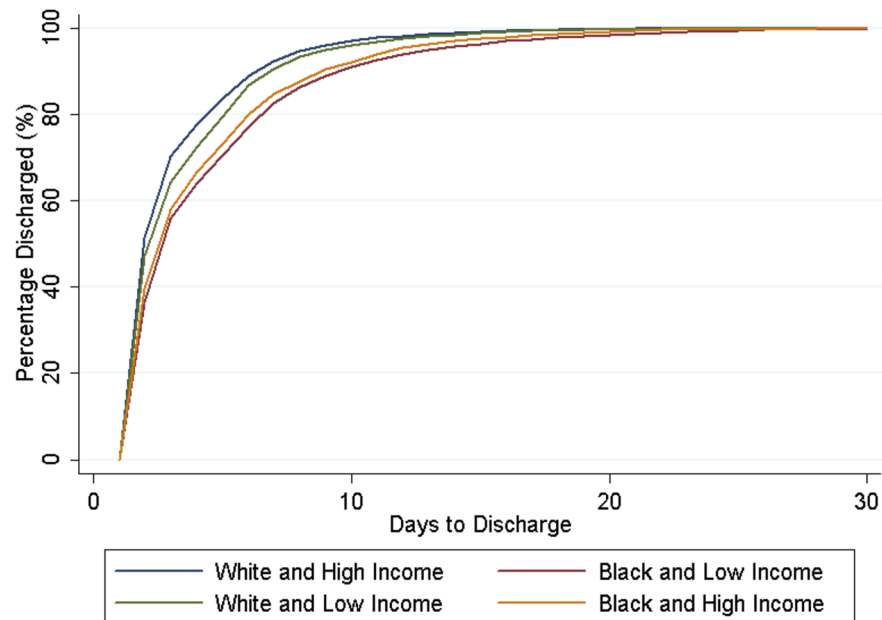

**Fig 3. Days Until Discharge Home after Appendicitis.**

doi:10.1371/journal.pone.0132758.g003

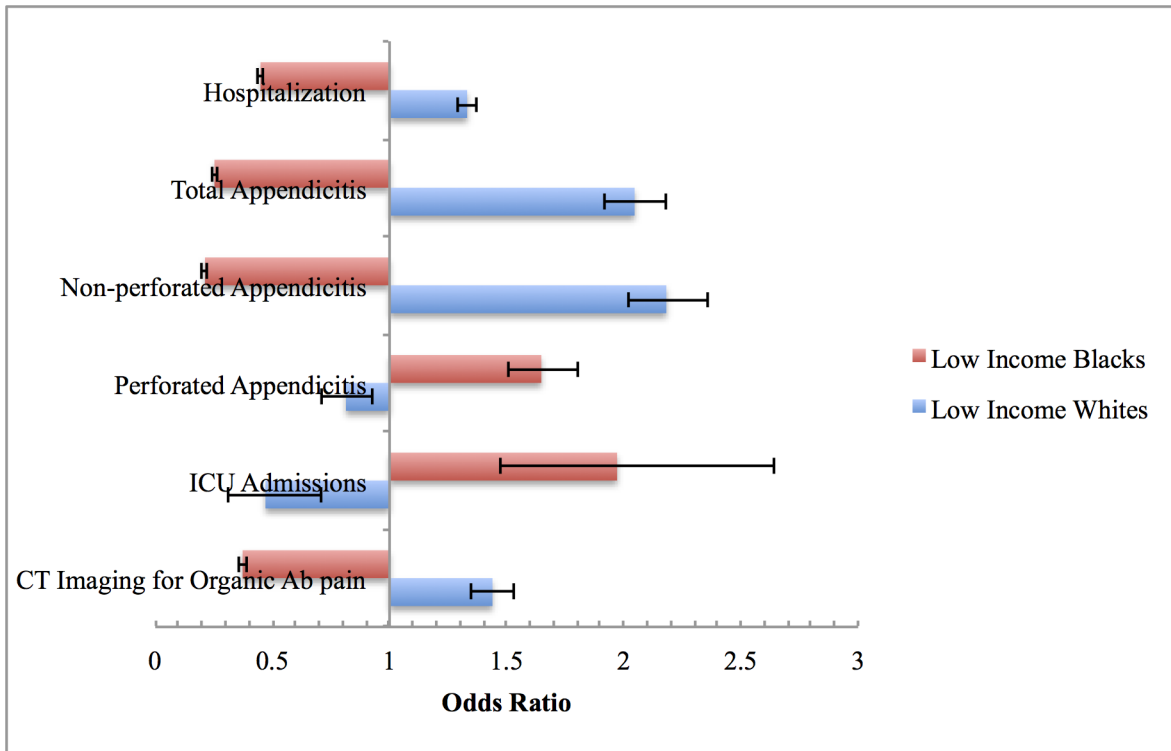

**Fig 4. Interaction between Race and Income among Black and Whites.** <sup>1</sup>Low Income Blacks compared with High Income Whites. <sup>2</sup>Low Income Whites compared with High Income Blacks.

doi:10.1371/journal.pone.0132758.g004

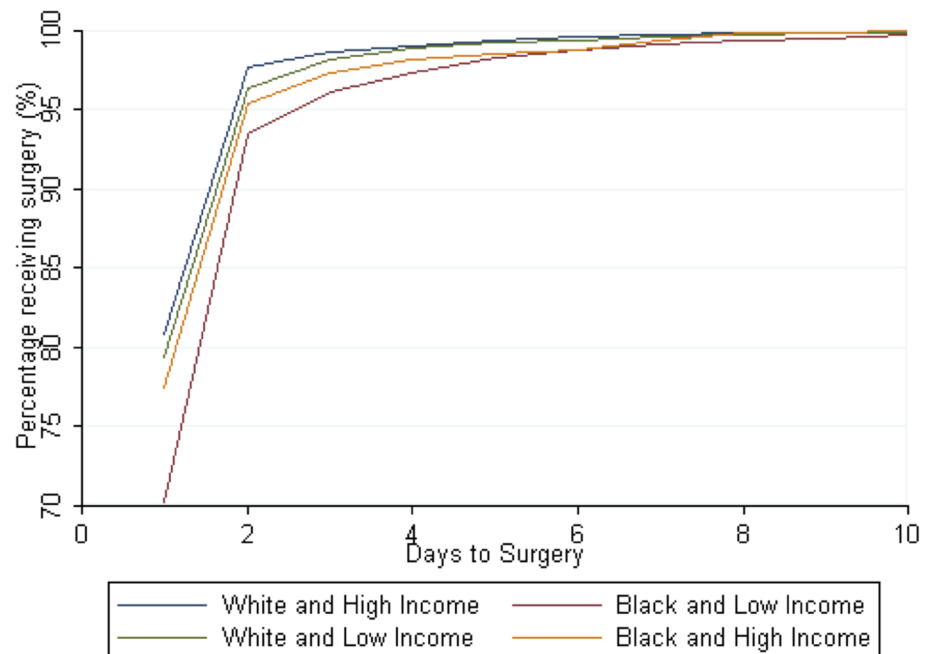

**Fig 5. Days to Surgery for General Appendicitis.**

doi:10.1371/journal.pone.0132758.g005

## Discussion

In a national cohort of 4,229,127 abdominal pain encounters, among them a majority—nearly 3 million—beginning in the ED care setting, we found that race and income differences correlate strongly with health outcomes among US children. First, Blacks, Hispanics, and low income children were less likely to be hospitalized from the ED than Whites—despite either similar or higher proportions of organic abdominal pain in Blacks and Hispanics, respectively. Second, Blacks, Hispanics, and low income children also had lower odds of imaging, including CT scans, for their organic abdominal pain. Third, using appendicitis as a clinical surrogate for organic abdominal pain in the ED, Blacks and Hispanics had higher odds of perforated appendicitis; Blacks had higher odds of ICU admissions and greater length of hospitalization overall. At any time point, Blacks, Hispanics, and low income children were also less likely to get surgery, even with a diagnosis of appendicitis.

Corroborating with our findings, a previous study shows that Blacks have lower odds of developing appendicitis, higher odds of complex appendicitis with perforation, and longer lengths of stay [17]. Additionally, Blacks, Hispanics, and children on Medicaid children are more likely to have perforated appendicitis, regardless of the hospital volume of the site of treatment [26]. However, neither of these studies tracked patients based on their initial presentation and triage in an ED. Our study has implications on the nature of patient care for abdominal pain, especially as the majority of abdominal pain cases in the PHIS dataset began in the ED. Differential care of patients and outcomes based on race and income may also begin here. This finding would have major implications on the ED and its role as a gatekeeper to address marginalized patients.

Based on our investigation, specific policy discussions are important. First, disparity of outcomes exists in the acute ED setting among children presenting with abdominal pain based on race and SES. Although difficult to extrapolate causality, our study supports existing literature on differences in health outcomes in the ED due to race and SES, as summarized by the Institute of Medicine [29]. One investigation concludes that observational stays outnumber 1-day stays from the ED, and patients of either observational or 1-day stays presented with similar medical conditions [30]. Thus, shorter hospitalizations serve similar patient concerns as those simply requiring hospital observation. In our study, Blacks, Hispanics, and low income children had lower odds of hospitalization for organic abdominal pain. Furthermore, we found that Blacks received less radiologic imaging overall for their generalized appendicitis but were equally likely to receive CT imaging for their perforated appendicitis—suggesting that imaging for Blacks was more reserved until urgent medical intervention was necessary, as Blacks had an unexplained 42% higher odds of appendicitis with perforation than Whites. Despite concerns for radiation exposure, safety, and efficacy [31–32], imaging is a highly sensitive test to determine the presence of appendicitis.

Second, differences in care in the ED setting may be attributed to how ED services are generally utilized based on patients' insurance status and ability to pay for health care at the gatekeeper primary care level. Since ED admissions contain a higher median profit than non-ED admissions, there is an economic incentive to move patients from EDs into a hospital bed [33–34]. Nevertheless, as shown in adolescents, patients use more ED resources when their primary care is lacking or are without health insurance [35], although there is some evidence that seeking non-urgent care in the ED is unrelated to insurance status [36]. In our study, Blacks and Hispanics had significantly fewer health insurance resources, which has been linked to lack of access to a primary care physician for early monitoring of medical conditions as people in poorer health were more than twice as likely to use the ED [37]. Evidence supports that Blacks and Hispanics are historically unable to see ED physicians within triage times comparable to

White patients [38], spend longer overall times in the ED [39], and are more likely to be denied authorization for ED visits by managed care organizations [40].

Third, the interpersonal dynamics between the provider and patient are difficult to parse and may play a role in clinical care delivery. In real-time delivery of care, when a child is seen for a chief complaint of abdominal pain, potential language and cultural barriers at the patient-provider level could potentiate suboptimal care among minorities and poor patients, especially in time-sensitive care [29] and over-crowded settings [41] as in the ED [29]. Literature supports language barriers as a major independent risk factor impeding quality health care [42–43]. Behavioral psychology during the delivery of care needs more careful evaluation, as racial differences between a physician and patient (e.g., White physician and Black patient) may be contributing to increased lack of mutual trust to facilitate care [44]. To fill this need for understanding of socioeconomic and race issues for clinicians, there have been programs to raise awareness of potential implicit biases among medical students [45], to understand unconscious biases [46], and to practice habituation with the goal of non-conscious processes to decrease bias [47]. In our study, we felt that focusing on Blacks, Whites, and Hispanics captured a representative population based on the population frequencies. However, Asians also had increased likelihood of appendicitis with perforation, and their results were included in the [S2 Table](#). Race and SES also influence physician perception of patients' abilities and behavioral tendencies [44]. In our study, it is conceivable that the longer wait times for surgery for Blacks, Hispanics, and low income children could potentiate complicated appendicitis, as non-Hispanic Black children were previously found to have lower odds of non-emergent ED visits than non-Hispanic White children [36].

Our investigation has several limitations. While our PHIS database is composed of 43 tertiary children's hospitals, there are many of hospitals outside of its realm and it is conceivable that patient demographics are not representative of all pediatric patients. Another limitation is that all codes are bundled based on the ED encounter, not by patient, because our data were structured to allow for breadth of abdominal pain visits. However, we believe the assumption of independence is upheld, as clinically, the diagnosis of appendicitis would likely only be offered once per patient as the management changes with this diagnosis, in addition to major risk and liability to clinician and patient. In our dataset, the vast majority of encounters as appendicitis were unique (< 3% were repeated encounters.) Our analysis involved only primary diagnoses that had presented to the emergency department and the focus was primarily on appendicitis. With bundling based on ED encounter, a procedure completed in the ED is not separated from a procedure in the hospital, if the patient is ultimately hospitalized. In addition, our PHIS database includes a variable of time since ED presentation, and not time since symptoms of abdominal pain. Finally, as discussed previously, beyond an associative relationship between race/SES and health outcomes related to organic abdominal pain, especially appendicitis severity, we are not able to conclusively remark on etiological processes in differential care. The goal of our analysis was to hypothesis test the relationship of race and income to various outcomes of abdominal pain after controlling for potential confounders. As an extension, we wanted to test the predictive properties of our model. We calculated the Hosmer–Lemeshow goodness of fit test statistic for our models, with chi-squared < 0.05. Our analysis serves our original purpose to relate race and income to outcomes of abdominal pain, but it does not serve as a predictor model. Furthermore, the Hosmer Lemeshow goodness of fit test statistic has a known dependence on sample size for its power, and therefore our large sample sizes likely greatly contributed to the test statistic.

In conclusion, our investigation is the first and largest of its kind to explore health outcome disparities among children in the ED with abdominal pain. Although our analysis may be describing one microcosm of the more macro-level disparities that may be occurring outside

the ED—for example, primary care access for all children—it serves as quantifiable evidence to highlight the differential care and outcomes that exist in the health care system associated with non-disease patient attributes.

## Supporting Information

**S1 Fig. Log Log Plot of Appendicitis with Perforation Race, Income Combined (Time to Discharge).**

(TIFF)

**S2 Fig. Schoenfeld Residual Appendicitis with Perforation Race, Income Combined (Time to Discharge).**

(TIFF)

**S1 Table. Patient Outcomes Stratified by SES from the ED.**

(DOCX)

**S2 Table. SES Influence on Hospital Outcomes (Aggregate).**

(DOCX)

## Acknowledgments

Authors thank the data collection efforts from the informatics team at Child Health Corporation of America. LW received research support from the Medical Scholars Program at Stanford University School of Medicine and the NASPGHAN Foundation for this study. JB is supported by CDEHA P30 AG17253 and NIH R21 AG041112. KTP is supported by NIH DK094868. The manuscript contents are solely the responsibility of the authors, performed independent of all funding sources, and do not necessarily represent the official views of the NIH, NASPGHAN, or Stanford University.

## Author Contributions

Conceived and designed the experiments: LW CH JB KP. Analyzed the data: LW KP. Wrote the paper: LW CH JB KP. Designed and led the data collection process: CT.

## References

1. Peery AF, Dellon ES, Lund J, Crockett SD, McGowan CE, Bulsiewicz WJ, et al. Burden of gastrointestinal disease in the United States: 2012 update. *Gastroenterology*. 2012; 143: 1179–87.e1–3. doi: [10.1053/j.gastro.2012.08.002](https://doi.org/10.1053/j.gastro.2012.08.002) PMID: [22885331](https://pubmed.ncbi.nlm.nih.gov/22885331/)
2. National Center for Health Statistics. National Hospital Ambulatory Medical Care Survey: 2009 Emergency Department Summary Tables. 2012: 1–37.
3. Leung A, Sigalet D. Acute abdominal pain in children. *Am Fam Physician*. 2003; 67: 2321–2326. PMID: [12800960](https://pubmed.ncbi.nlm.nih.gov/12800960/)
4. Dhroove G, Chogle A, Saps M. A Million-dollar Work-up for Abdominal Pain: Is It Worth It? *Journal of Pediatric Gastroenterology and Nutrition*. 2010; 51: 579–583. doi: [10.1097/MPG.0b013e3181de0639](https://doi.org/10.1097/MPG.0b013e3181de0639) PMID: [20706149](https://pubmed.ncbi.nlm.nih.gov/20706149/)
5. Hyams JS, Hyman PE. Recurrent abdominal pain and the biopsychosocial model of medical practice. *The Journal of Pediatrics*. Elsevier; 1998; 133: 473–478. doi: [10.1016/S0022-3476\(98\)70053-8](https://doi.org/10.1016/S0022-3476(98)70053-8)
6. Lester CW. Acute Surgical Conditions of the Abdomen in Children. *Bull N Y Acad Med*. 1941; 17: 844–853. PMID: [19312233](https://pubmed.ncbi.nlm.nih.gov/19312233/)
7. Myer PA, Mannalithara A, Singh G, Singh G, Pasricha PJ, Ladabaum U. Clinical and Economic Burden of Emergency Department Visits Due to Gastrointestinal Diseases in the United States. *The American Journal of Gastroenterology*. 2013; 108: 1496–1507. doi: [10.1038/ajg.2013.199](https://doi.org/10.1038/ajg.2013.199) PMID: [23857475](https://pubmed.ncbi.nlm.nih.gov/23857475/)

8. Cheong LHA, Emil S. Outcomes of pediatric appendicitis: an international comparison of the United States and Canada. *JAMA Surg.* 2014; 149: 50–55. doi: [10.1001/jamasurg.2013.2517](https://doi.org/10.1001/jamasurg.2013.2517) PMID: [24257904](https://pubmed.ncbi.nlm.nih.gov/24257904/)
9. Ponsky TA, Huang ZJ, Kittle K, Eichelberger MR, Gilbert JC, Brody F, et al. Hospital- and patient-level characteristics and the risk of appendiceal rupture and negative appendectomy in children. *JAMA. American Medical Association*; 2004; 292: 1977–1982. doi: [10.1001/jama.292.16.1977](https://doi.org/10.1001/jama.292.16.1977)
10. Tang N, Stein J, Hsia RY, Maselli JH, Gonzales R. Trends and characteristics of US emergency department visits, 1997–2007. *JAMA.* 2010; 304: 664–670. doi: [10.1001/jama.2010.1112](https://doi.org/10.1001/jama.2010.1112) PMID: [20699458](https://pubmed.ncbi.nlm.nih.gov/20699458/)
11. Institute of Medicine. IOM Report: The Future of Emergency Care in the United States Health System. *Academic Emergency Medicine.* 2006; 13: 1081–1085. doi: [10.1197/j.aem.2006.07.011](https://doi.org/10.1197/j.aem.2006.07.011) PMID: [17015421](https://pubmed.ncbi.nlm.nih.gov/17015421/)
12. Schrader CD, Lewis LM. Racial disparity in emergency department triage. *Journal of Emergency Medicine.* 2013; 44: 511–518. doi: [10.1016/j.jemermed.2012.05.010](https://doi.org/10.1016/j.jemermed.2012.05.010) PMID: [22818646](https://pubmed.ncbi.nlm.nih.gov/22818646/)
13. Sonnenfeld N, Pitts S, Schappert S, Decker S. Emergency department volume and racial and ethnic differences in waiting times in the United States. *Medical Care.* 50: 335–341. doi: [10.1097/mlr.0b013e318245a53c](https://doi.org/10.1097/mlr.0b013e318245a53c) PMID: [22270097](https://pubmed.ncbi.nlm.nih.gov/22270097/)
14. Pines JM, Russell Localio A, Hollander JE. Racial Disparities in Emergency Department Length of Stay for Admitted Patients in the United States. *Academic Emergency Medicine.* Blackwell Publishing Ltd; 2009; 16: 403–410. doi: [10.1111/j.1553-2712.2009.00381.x](https://doi.org/10.1111/j.1553-2712.2009.00381.x)
15. Mills A, Shofer F, Boulis A, Holena D, Abuhhl S. Racial disparity in analgesic treatment for ED patients with abdominal or back pain. *American Journal of Emergency Medicine.* Elsevier Inc; 2011; 29: 752–756. doi: [10.1016/j.ajem.2010.02.023](https://doi.org/10.1016/j.ajem.2010.02.023)
16. Johnson PA, Lee TH, Cook EF, Rouan GW, Goldman L. Effect of Race on the Presentation and Management of Patients with Acute Chest Pain. *Ann Intern Med.* American College of Physicians; 1993; 118: 593–601. doi: [10.7326/0003-4819-118-8-199304150-00004](https://doi.org/10.7326/0003-4819-118-8-199304150-00004)
17. Kokoska ER, Bird TM, Robbins JM, Smith SD, Corsi JM, Campbell BT. Racial disparities in the management of pediatric appendicitis. *J Surg Res.* 2007; 137: 83–88. doi: [10.1016/j.jss.2006.06.020](https://doi.org/10.1016/j.jss.2006.06.020) PMID: [17109888](https://pubmed.ncbi.nlm.nih.gov/17109888/)
18. Johnson TJ, Weaver MD, Borrero S, Davis EM, Myaskovsky L, Zuckerbraun NS, et al. Association of Race and Ethnicity With Management of Abdominal Pain in the Emergency Department. *PEDIATRICS.* 2013; 132: e851–e858. doi: [10.1542/peds.2012-3127](https://doi.org/10.1542/peds.2012-3127) PMID: [24062370](https://pubmed.ncbi.nlm.nih.gov/24062370/)
19. Hambrook JT, Kimball TR, Khoury P, Cnota J. Disparities exist in the emergency department evaluation of pediatric chest pain. *Congenital Heart Disease.* 2010; 5: 285–291. doi: [10.1111/j.1747-0803.2010.00414.x](https://doi.org/10.1111/j.1747-0803.2010.00414.x) PMID: [20576048](https://pubmed.ncbi.nlm.nih.gov/20576048/)
20. Rinderknecht AS, Ho M, Matykiewicz P, Grupp-Phelan JM. Referral to the emergency department by a primary care provider predicts severity of illness. *PEDIATRICS.* 2010; 126: 917–924. doi: [10.1542/peds.2010-0364](https://doi.org/10.1542/peds.2010-0364) PMID: [20956418](https://pubmed.ncbi.nlm.nih.gov/20956418/)
21. Petersen LA, Burstin HR, O'Neil AC, Orav EJ, Brennan TA. Nonurgent emergency department visits: the effect of having a regular doctor. *Medical Care.* 1998; 36: 1249–1255. PMID: [9708596](https://pubmed.ncbi.nlm.nih.gov/9708596/)
22. Haltiwanger KA, Pines JM, Martin ML. The pediatric emergency department: a substitute for primary care? *Cal J Emerg Med.* 2006; 7: 26–30. PMID: [20505803](https://pubmed.ncbi.nlm.nih.gov/20505803/)
23. Doobinin KA, Heidt-Davis PE, Gross TK, Isaacman DJ. Nonurgent pediatric emergency department visits: Care-seeking behavior and parental knowledge of insurance. *Pediatr Emerg Care.* 2003; 19: 10–14. PMID: [12592106](https://pubmed.ncbi.nlm.nih.gov/12592106/)
24. Grøholt E-K, Stigum H, Nordhagen R, Köhler L. Recurrent pain in children, socio-economic factors and accumulation in families. *Eur J Epidemiol.* 2003; 18: 965–975. PMID: [14598927](https://pubmed.ncbi.nlm.nih.gov/14598927/)
25. Schwille IJD, Giel KE, Ellert U, Zipfel S, Enck P. A community-based survey of abdominal pain prevalence, characteristics, and health care use among children. *Clin Gastroenterol Hepatol.* 2009; 7: 1062–1068. doi: [10.1016/j.cgh.2009.07.002](https://doi.org/10.1016/j.cgh.2009.07.002) PMID: [19602449](https://pubmed.ncbi.nlm.nih.gov/19602449/)
26. Smink DS, Fishman SJ, Kleinman K, Finkelstein JA. Effects of Race, Insurance Status, and Hospital Volume on Perforated Appendicitis in Children. *PEDIATRICS.* 2005; 115: 920–925. doi: [10.1542/peds.2004-1363](https://doi.org/10.1542/peds.2004-1363) PMID: [15805365](https://pubmed.ncbi.nlm.nih.gov/15805365/)
27. Hofer TP, Wolfe RA, Tedeschi PJ, McMahon LF, Griffith JR. Use of community versus individual socioeconomic data in predicting variation in hospital use. *Health Services Research.* Health Research & Educational Trust; 1998; 33: 243–259.
28. Torpy JM, Lynn C, Glass RM. Chronic Diseases of Children. *JAMA.* American Medical Association; 2007; 297: 2836–2836. doi: [10.1001/jama.297.24](https://doi.org/10.1001/jama.297.24)



29. Cone DC, Richardson L, Todd K, Betancourt J, Lowe R. Health Care Disparities in Emergency Medicine. *Academic Emergency Medicine*. 2003; 10: 1176–1183. doi: [10.1197/S1069-6563\(03\)00486-X](https://doi.org/10.1197/S1069-6563(03)00486-X) PMID: [14597492](https://pubmed.ncbi.nlm.nih.gov/14597492/)
30. Macy ML, Hall M, Shah SS, Harding JP, Del Beccaro MA, Hain PD, et al. Pediatric observation status: Are we overlooking a growing population in children's hospitals? *J Hosp Med*. 2012; 7: 530–536. doi: [10.1002/jhm.1923](https://doi.org/10.1002/jhm.1923) PMID: [22371384](https://pubmed.ncbi.nlm.nih.gov/22371384/)
31. Brenner D, Elliston C, Hall E, Berdon W. Estimated risks of radiation-induced fatal cancer from pediatric CT. *AJR Am J Roentgenol*. 2001; 176: 289–296. doi: [10.2214/ajr.176.2.1760289](https://doi.org/10.2214/ajr.176.2.1760289) PMID: [11159059](https://pubmed.ncbi.nlm.nih.gov/11159059/)
32. Mark PS, Salotti J, Little M, FRCR KM, Lee C, Kim KP, et al. Radiation exposure from CT scans in childhood and subsequent risk of leukaemia and brain tumours: a retrospective cohort study. *The Lancet*. Elsevier Ltd; 2012; 380: 499–505. doi: [10.1016/s0140-6736\(12\)60815-0](https://doi.org/10.1016/s0140-6736(12)60815-0)
33. Henneman PL, Lemanski M, Smithline HA, Tomaszewski A, Mayforth JA. Emergency department admissions are more profitable than non-emergency department admissions. *Annals of Emergency Medicine*. Elsevier; 2009; 53: 249–255. doi: [10.1016/j.annemergmed.2008.07.016](https://doi.org/10.1016/j.annemergmed.2008.07.016)
34. Ben-Isaac E, Schragger SM, Keefer M, Chen AY. National profile of nonemergent pediatric emergency department visits. *PEDIATRICS*. American Academy of Pediatrics; 2010; 125: 454–459. doi: [10.1542/peds.2009-0544](https://doi.org/10.1542/peds.2009-0544)
35. Ziv A, Boulet JR, Slap GB. Emergency Department Utilization by Adolescents in the United States. *PEDIATRICS*. 1998; 101: 987–994. doi: [10.1542/peds.101.6.987](https://doi.org/10.1542/peds.101.6.987) PMID: [9606224](https://pubmed.ncbi.nlm.nih.gov/9606224/)
36. Luo X, Liu G, Frush K, Hey LA. Children's Health Insurance Status and Emergency Department Utilization in the United States. *PEDIATRICS*. American Academy of Pediatrics; 2011; 112: 314–319. doi: [10.1542/peds.112.2.314](https://doi.org/10.1542/peds.112.2.314)
37. Rust G, Ye J, Baltrus P, Daniels E, Adesunloye B, Fryer GE. Practical barriers to timely primary care access: impact on adult use of emergency department services. *Arch Intern Med*. American Medical Association; 2008; 168: 1705–1710. doi: [10.1001/archinte.168.15.1705](https://doi.org/10.1001/archinte.168.15.1705)
38. Horwitz LI, Bradley EH. Percentage of US emergency department patients seen within the recommended triage time: 1997 to 2006. *Arch Intern Med*. American Medical Association; 2009; 169: 1857–1865. doi: [10.1001/archinternmed.2009.336](https://doi.org/10.1001/archinternmed.2009.336)
39. Park CY, Lee MA, Epstein AJ. Variation in Emergency Department Wait Times for Children by Race/Ethnicity and Payment Source. *Health Services Research*. 2009; 44: 2022–2039. doi: [10.1111/j.1475-6773.2009.01020.x](https://doi.org/10.1111/j.1475-6773.2009.01020.x) PMID: [19732167](https://pubmed.ncbi.nlm.nih.gov/19732167/)
40. Lowe RA, Chhaya S, Nasci K, Gavin LJ, Shaw K, Zwanger ML, et al. Effect of Ethnicity on Denial of Authorization for Emergency Department Care by Managed Care Gatekeepers. *Academic Emergency Medicine*. Blackwell Publishing Ltd; 2001; 8: 259–266. doi: [10.1111/j.1553-2712.2001.tb01302.x](https://doi.org/10.1111/j.1553-2712.2001.tb01302.x)
41. Pines JM, Hollander JE. Emergency Department Crowding Is Associated With Poor Care for Patients With Severe Pain. *Annals of Emergency Medicine*. 2008; 51: 1–5. doi: [10.1016/j.annemergmed.2007.07.008](https://doi.org/10.1016/j.annemergmed.2007.07.008) PMID: [17913299](https://pubmed.ncbi.nlm.nih.gov/17913299/)
42. Yu SM, Singh GK. Household Language Use and Health Care Access, Unmet Need, and Family Impact Among CSHCN. *PEDIATRICS*. 2009; 124: S414–S419. doi: [10.1542/peds.2009-1255M](https://doi.org/10.1542/peds.2009-1255M) PMID: [19948607](https://pubmed.ncbi.nlm.nih.gov/19948607/)
43. Mendoza FS. Health Disparities and Children in Immigrant Families: A Research Agenda. *PEDIATRICS*. 2009; 124: S187–S195. doi: [10.1542/peds.2009-1100F](https://doi.org/10.1542/peds.2009-1100F) PMID: [19861469](https://pubmed.ncbi.nlm.nih.gov/19861469/)
44. van Ryn M, Burke J. The effect of patient race and socio-economic status on physicians' perceptions of patients. *Soc Sci Med*. 2000; 50: 813–828. PMID: [10695979](https://pubmed.ncbi.nlm.nih.gov/10695979/)
45. Teal CR, Shada RE, Gill AC, Thompson BM, Frugé E, Villarreal GB, et al. When Best Intentions Aren't Enough: Helping Medical Students Develop Strategies for Managing Bias about Patients. *J GEN INTERN MED*. 2010; 25: 115–118. doi: [10.1007/s11606-009-1243-y](https://doi.org/10.1007/s11606-009-1243-y) PMID: [20352504](https://pubmed.ncbi.nlm.nih.gov/20352504/)
46. Stone J, Moskowitz GB. Non-conscious bias in medical decision making: what can be done to reduce it? *Medical Education* 2011; 45:768–776. doi: [10.1111/j.1365-2923.2011.04026.x](https://doi.org/10.1111/j.1365-2923.2011.04026.x) PMID: [21752073](https://pubmed.ncbi.nlm.nih.gov/21752073/)
47. Byrne A, Tanesini A. Instilling new habits: addressing implicit bias in healthcare professionals. *Adv Health Sci Educ Theory Pract*. 2015. doi: [10.1007/s10459-015-9600-6](https://doi.org/10.1007/s10459-015-9600-6)
